# Supplementary material for: Mapping the splicing landscape of the human immune system
Source: PubMed Central journal article supplement (PMC10499523; doi:10.3389/fimmu.2023.1116392), 2023-08-30
Supplement: DataSheet_1.pdf [file DataSheet_1.pdf]

A

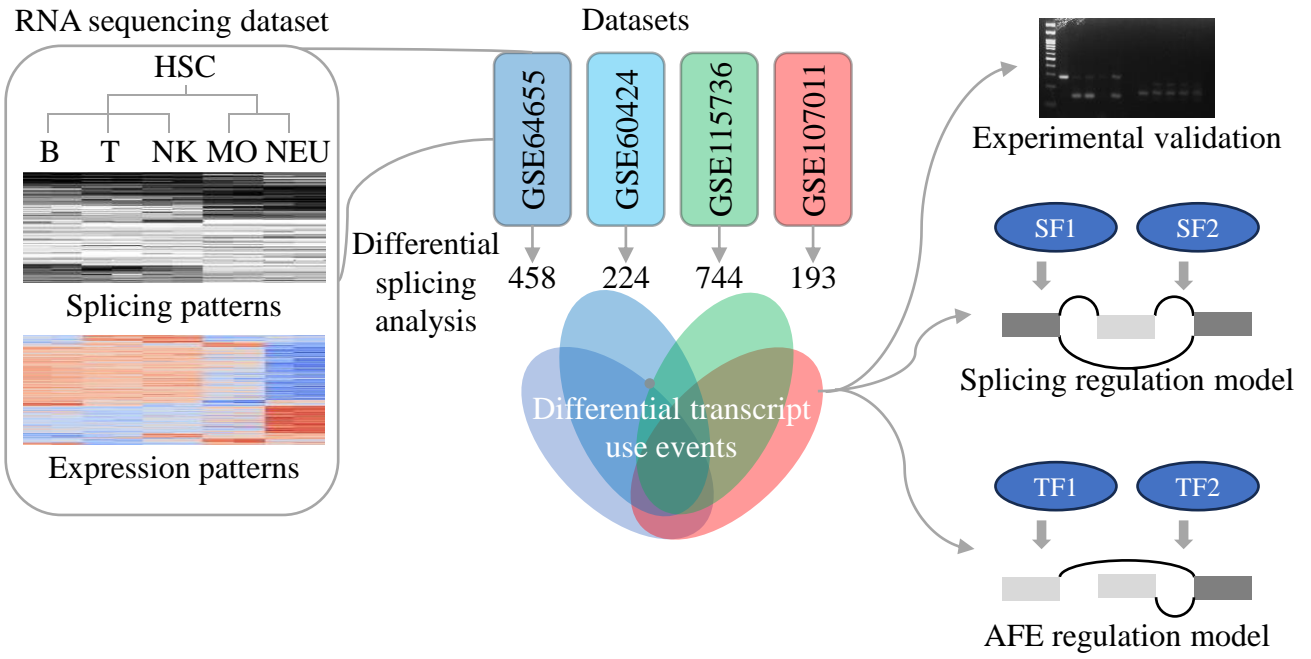

B

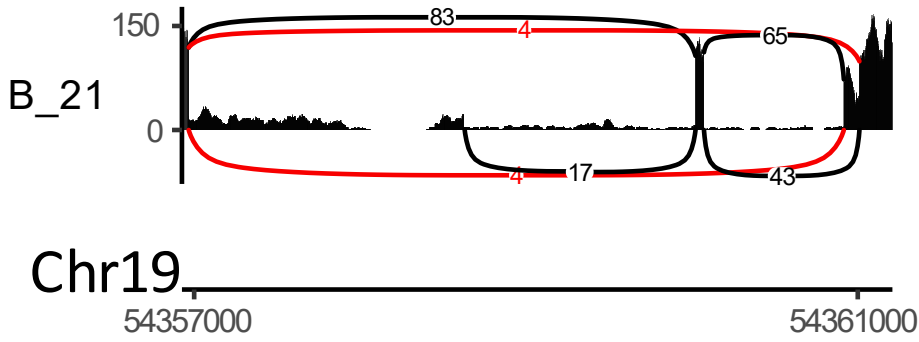

C

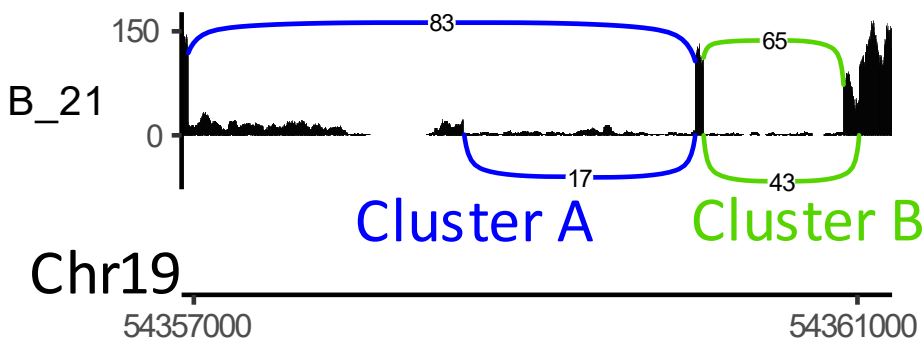

Figure S1

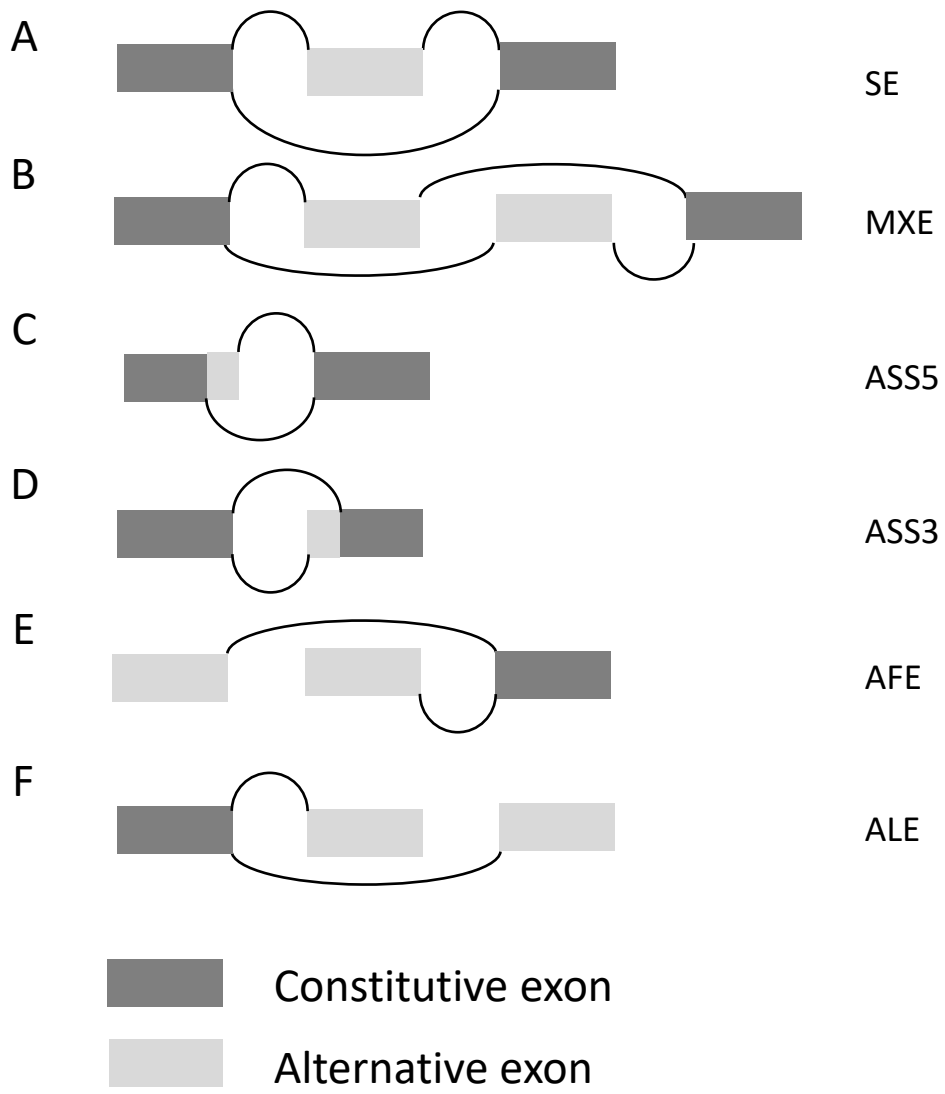

Figure S2

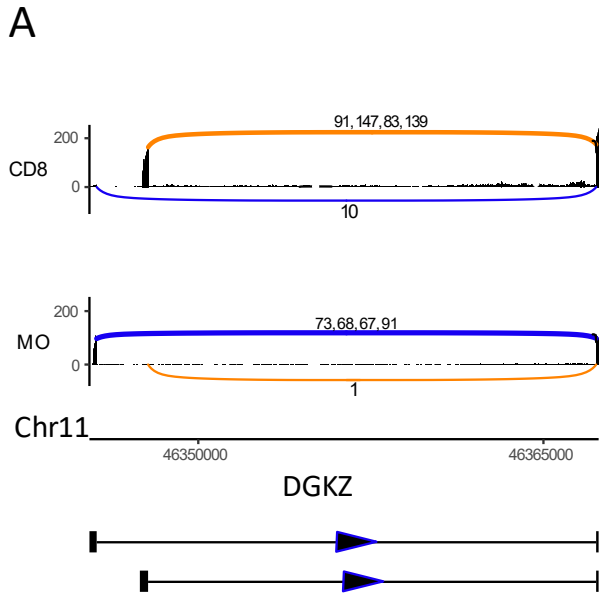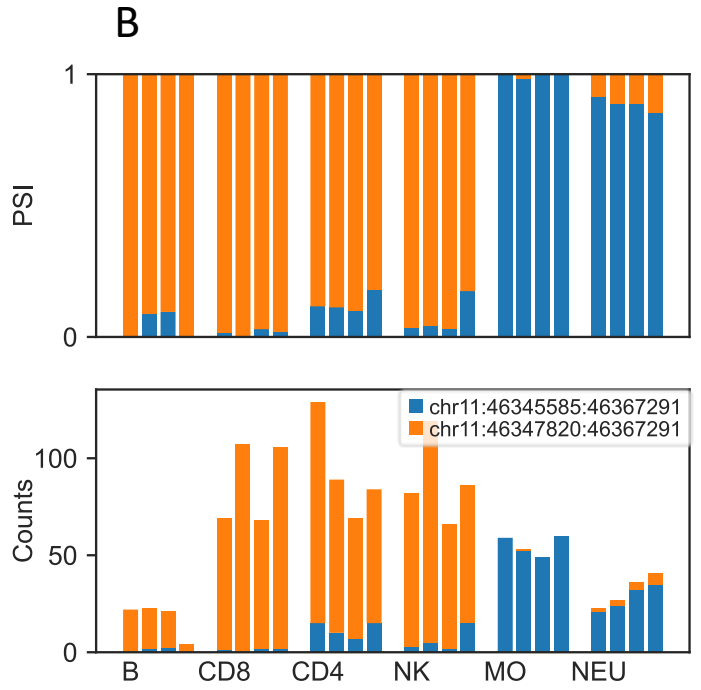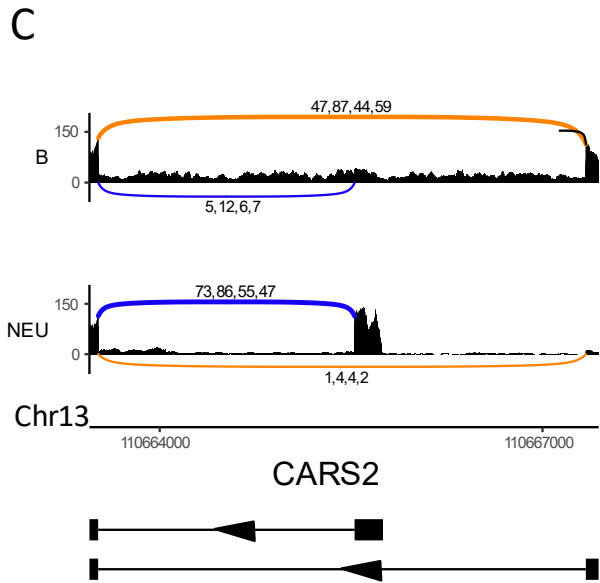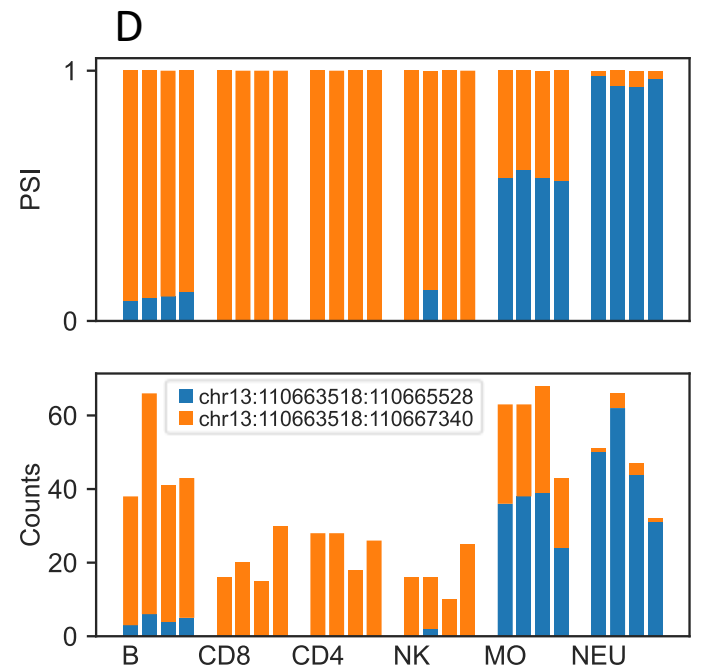

Figure S3

A

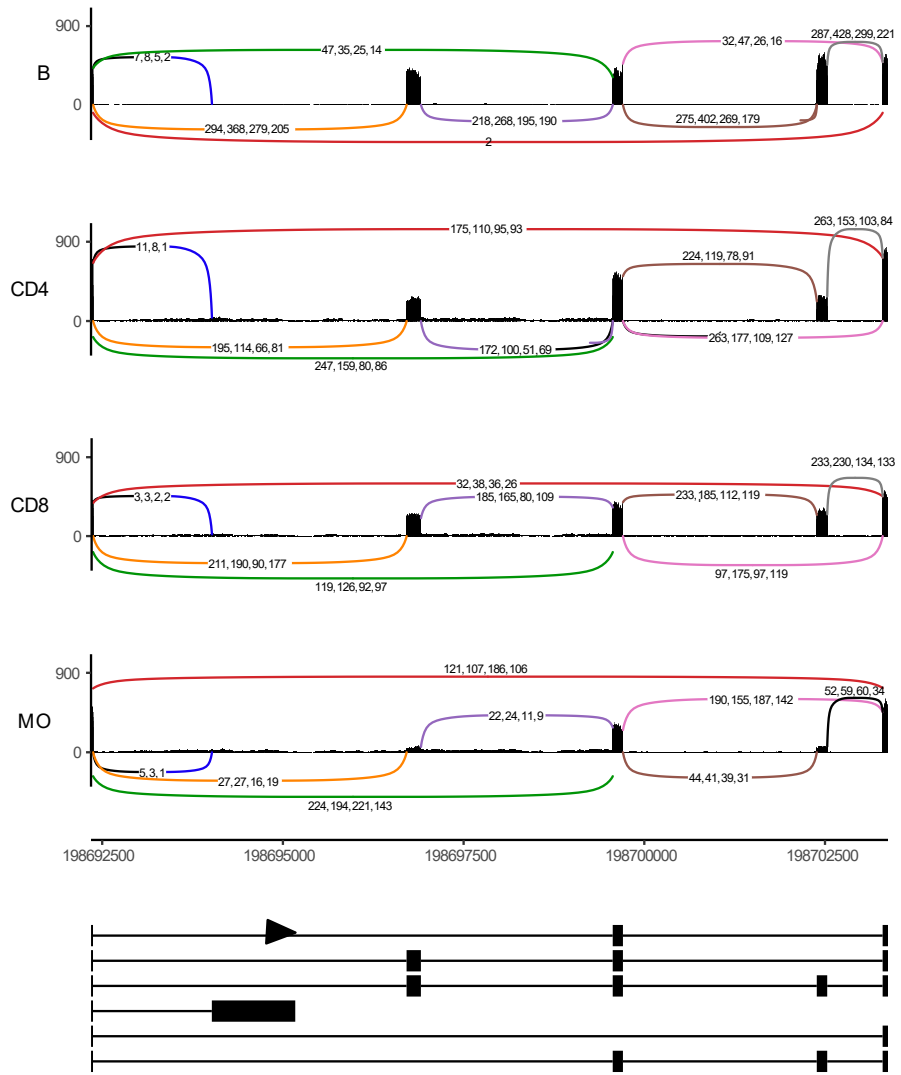

B

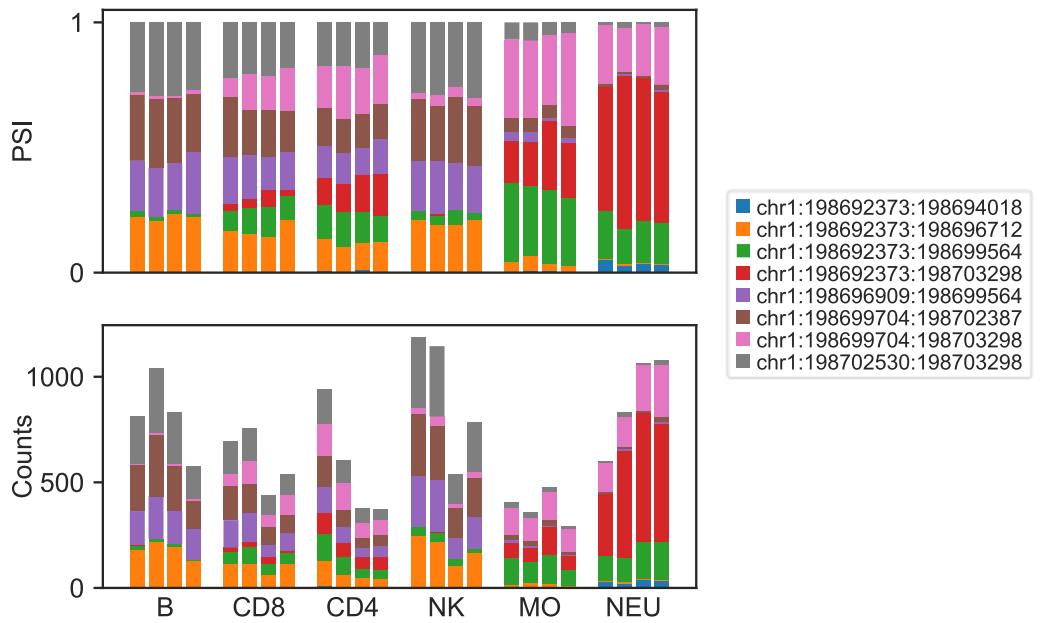

Figure S4

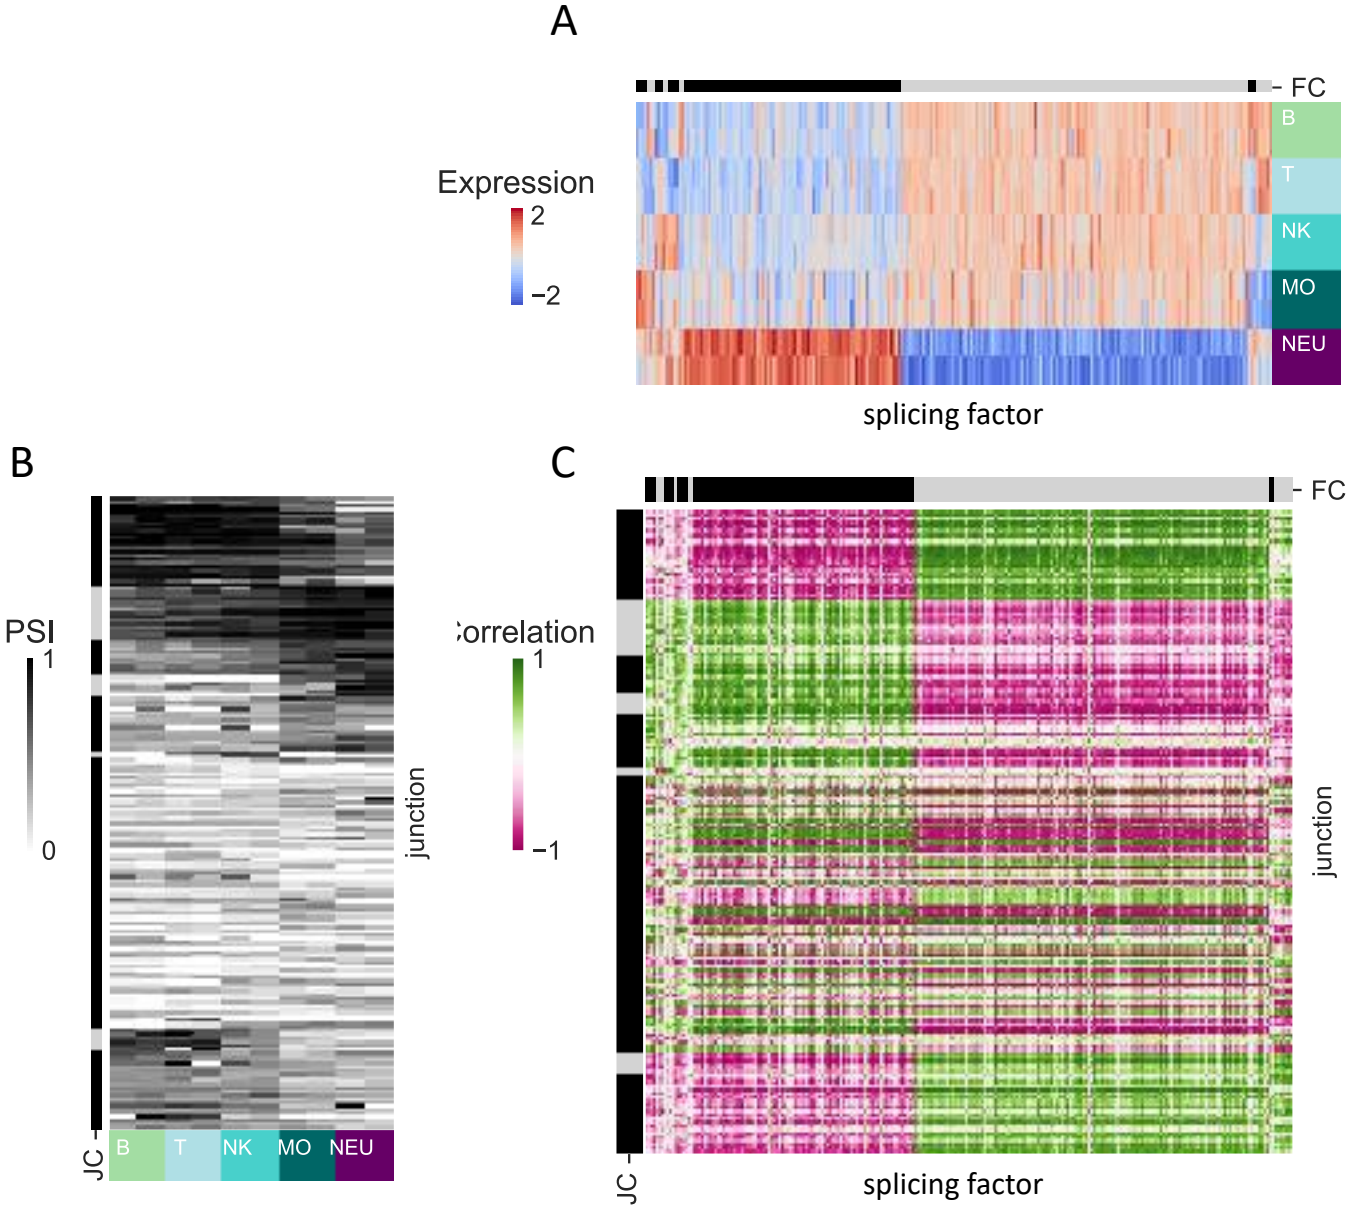

Figure S5

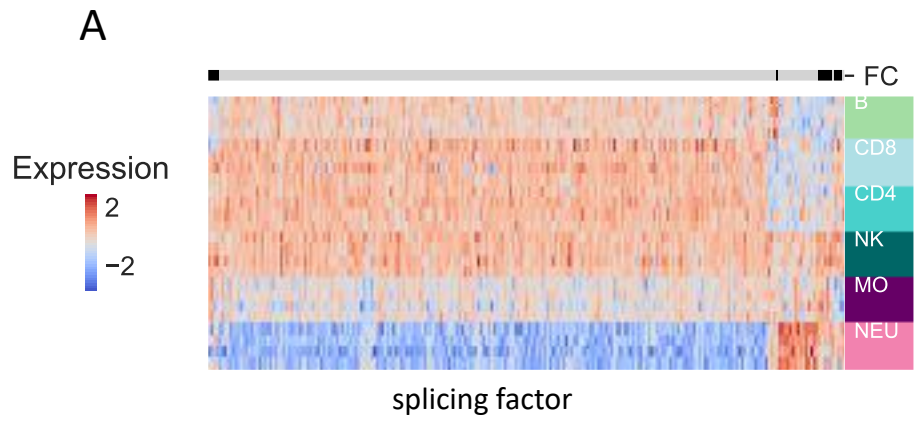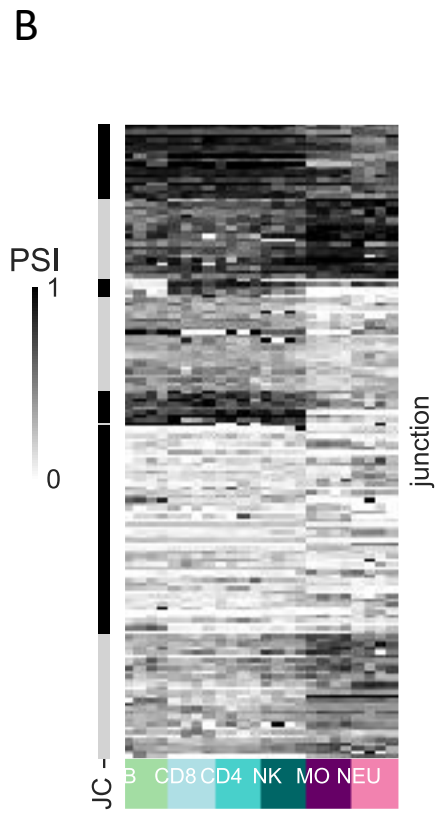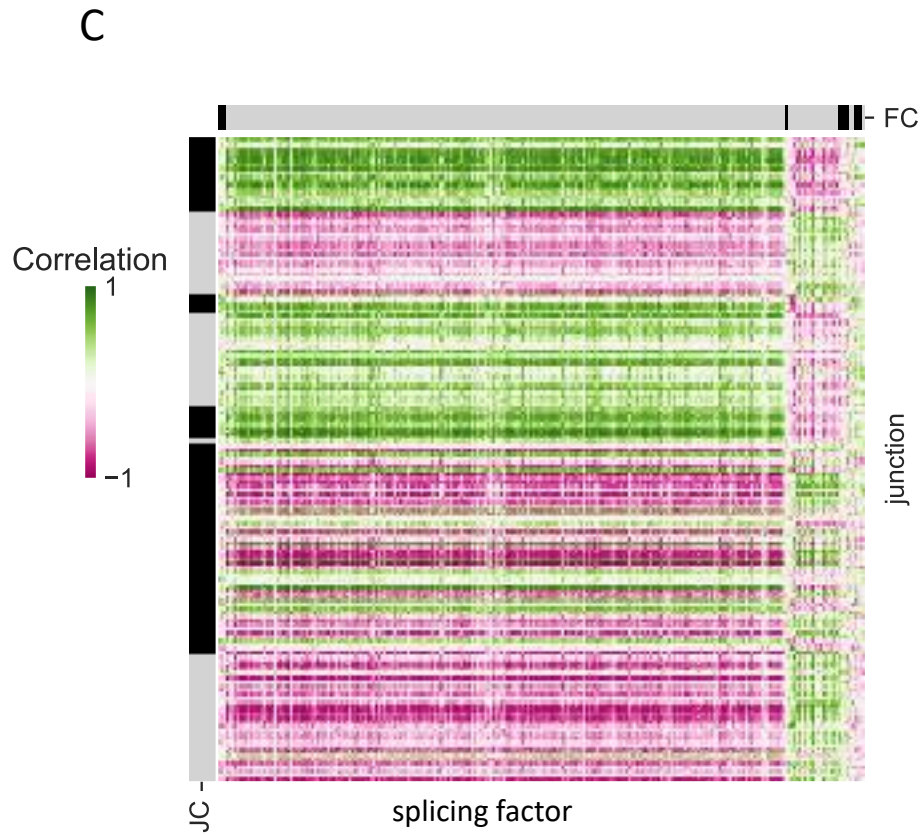

Figure S6



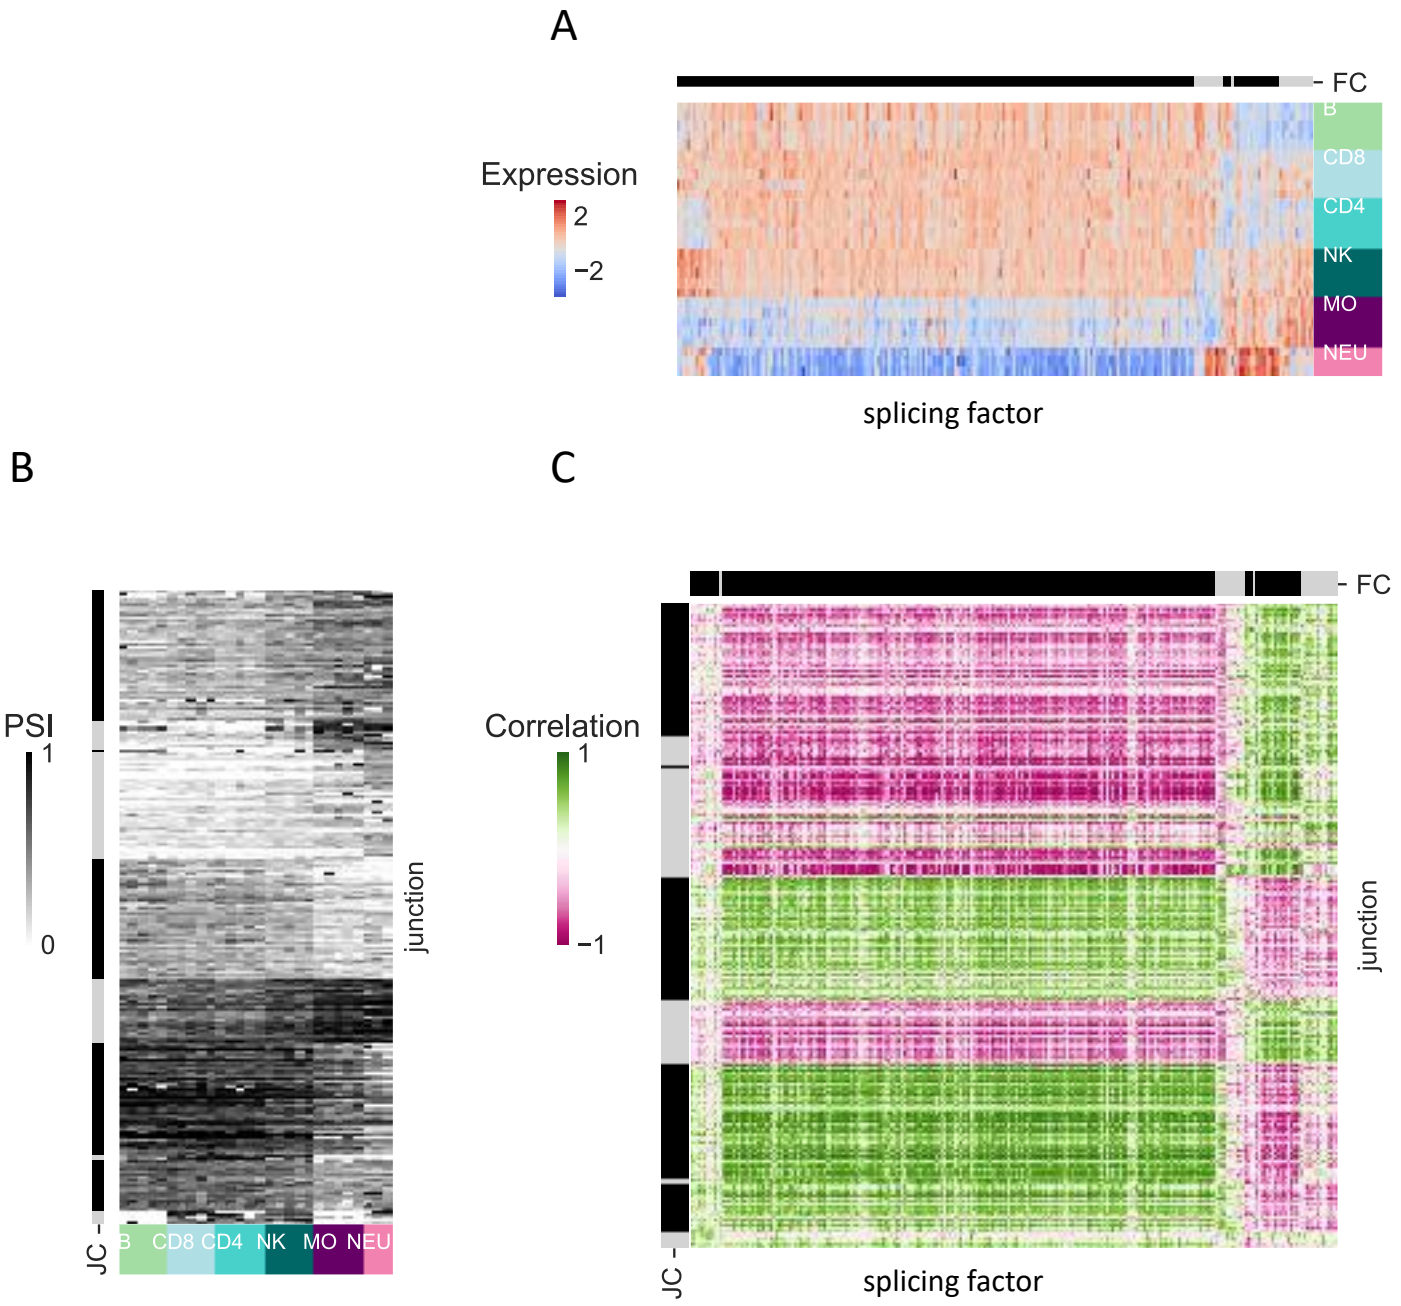

Figure S7

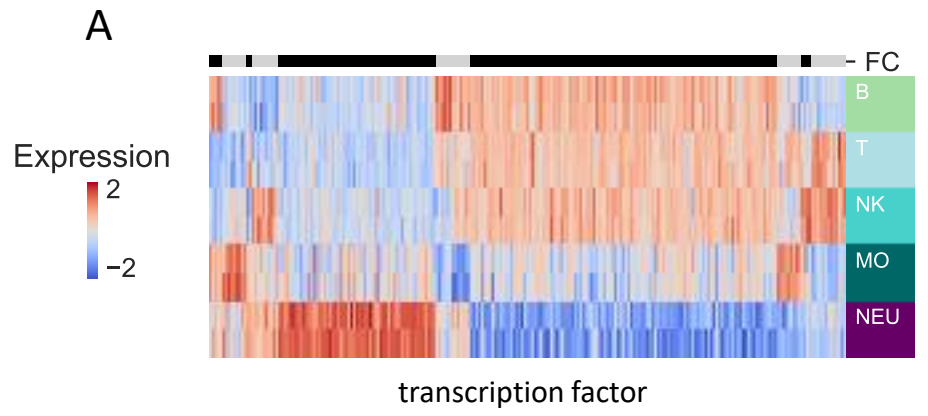

**B**

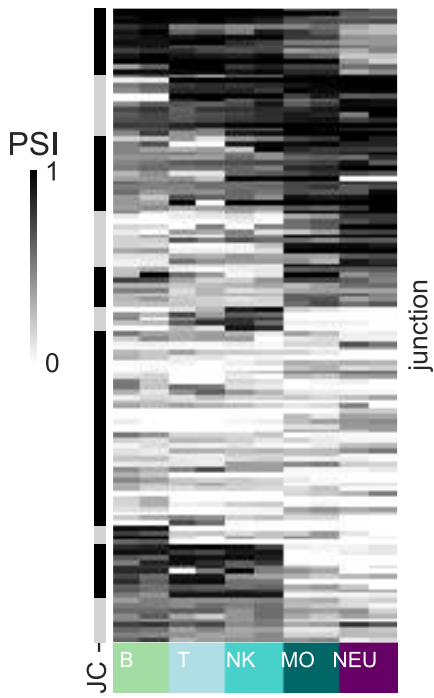

**C**

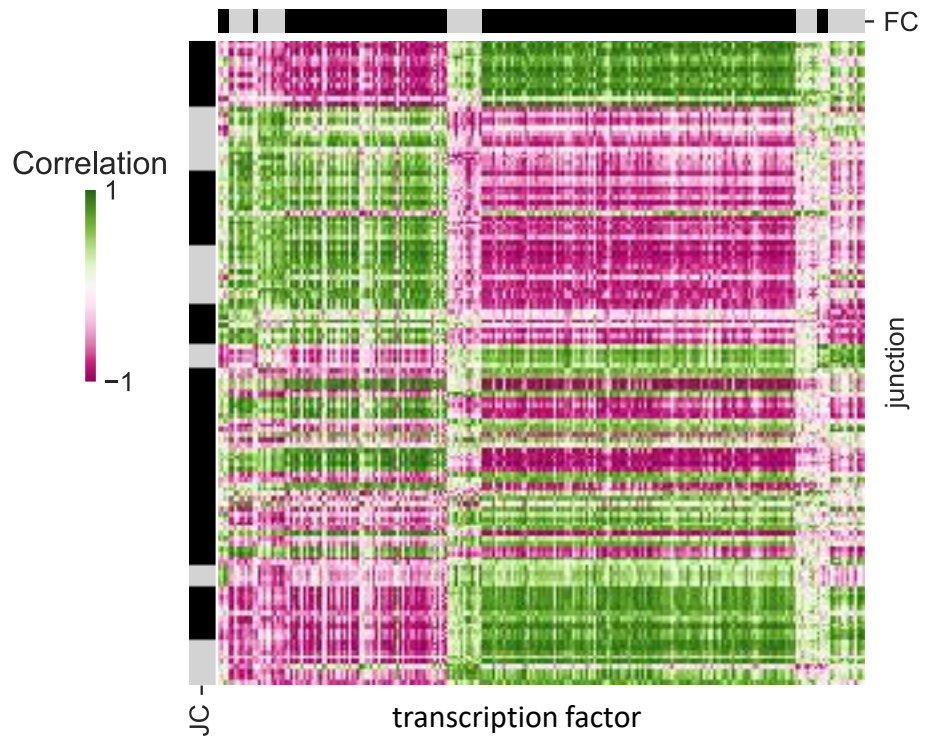

Figure S8



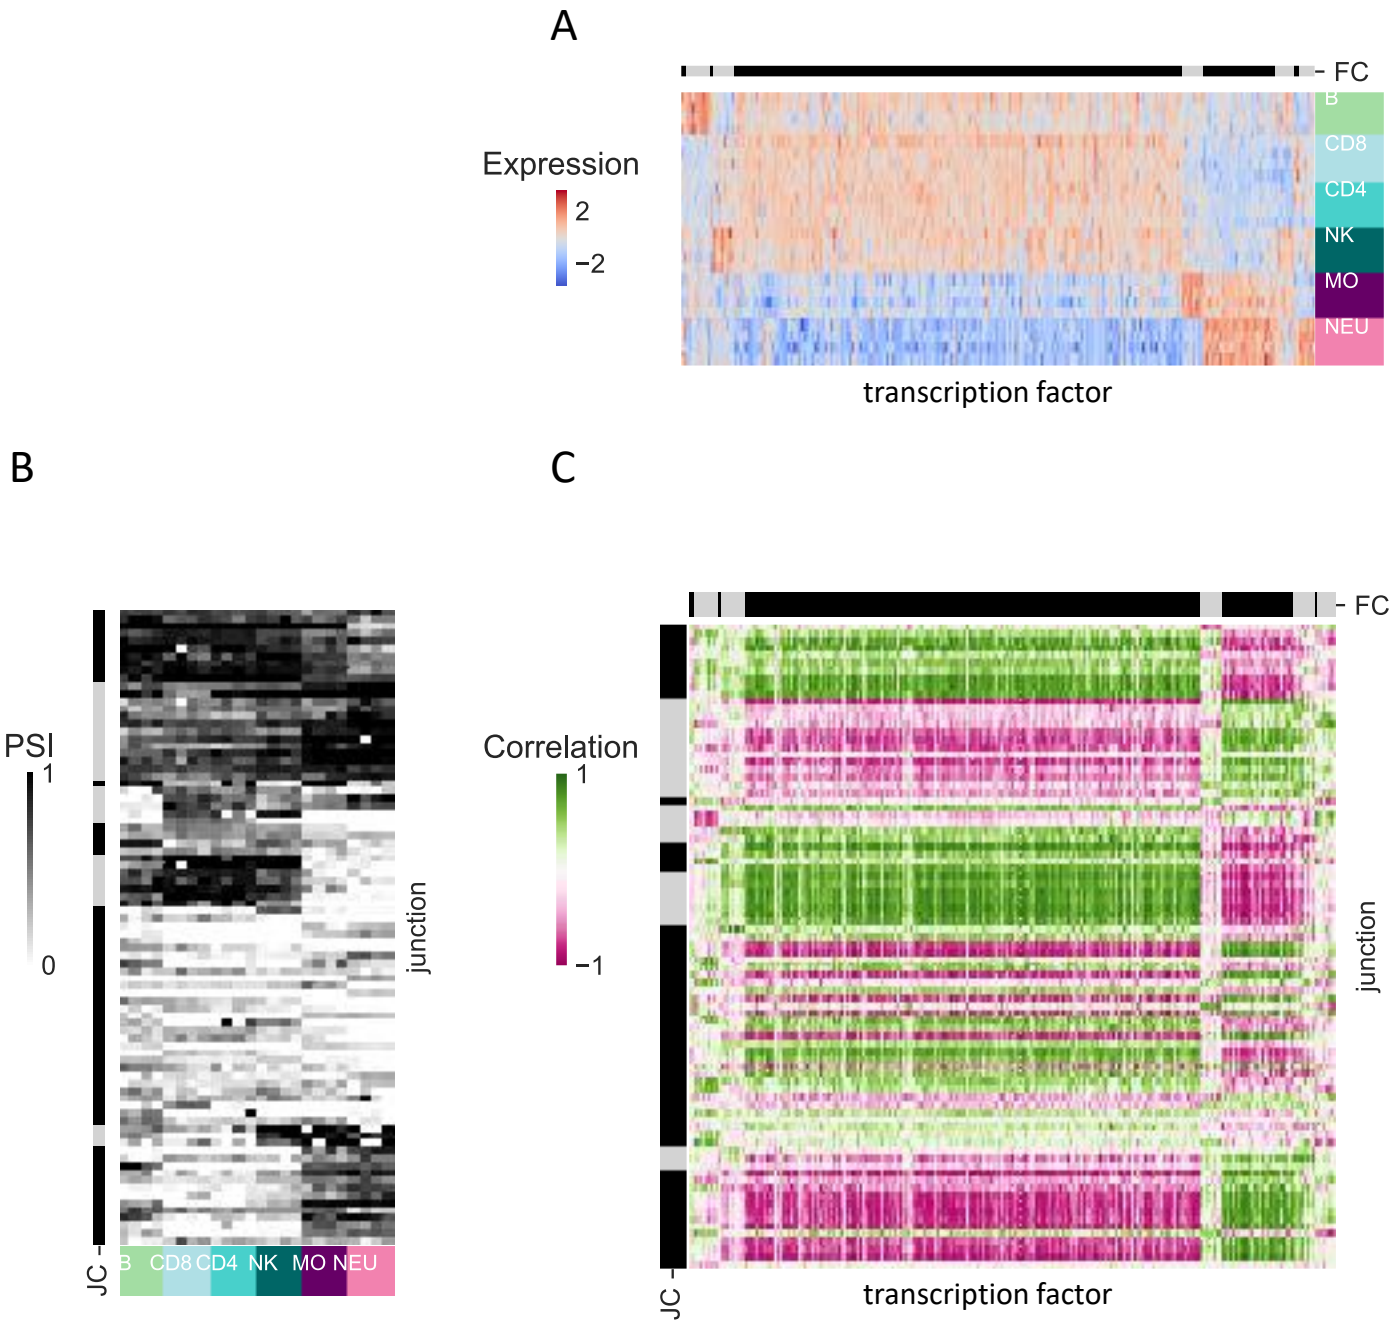

Figure S9

A

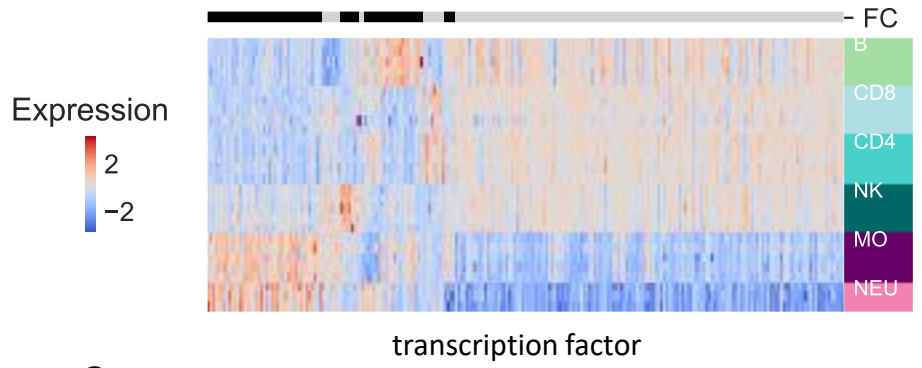

B

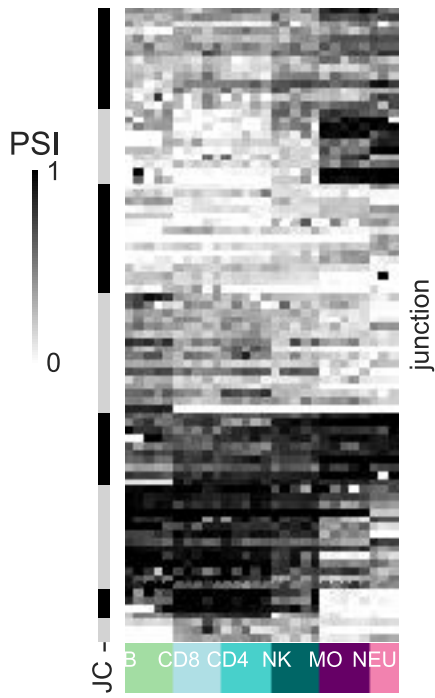

C

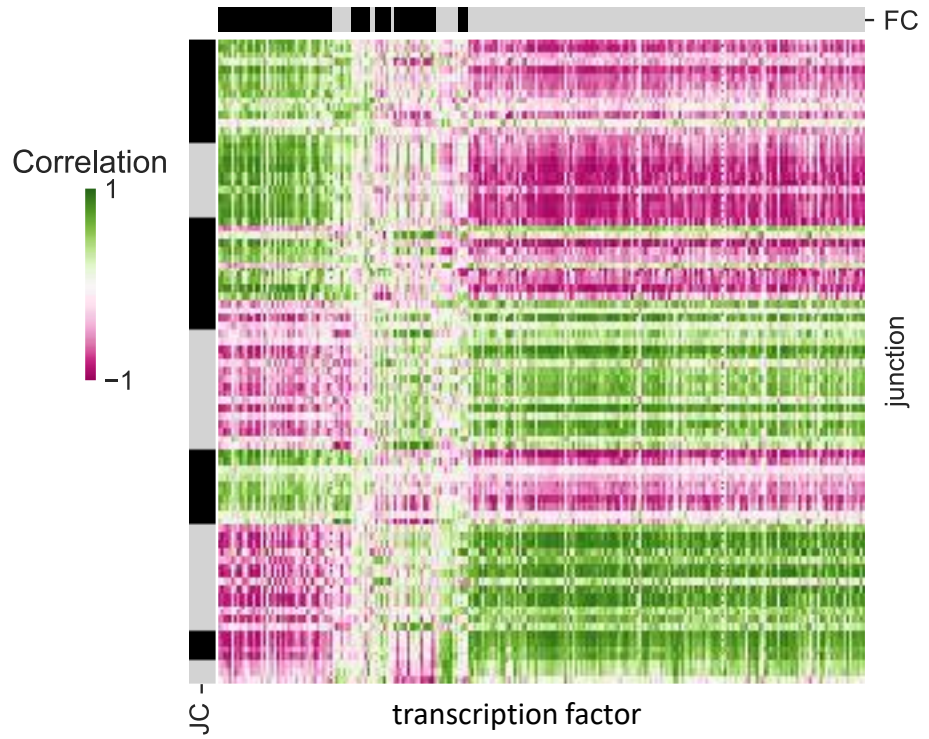

Figure S10

A

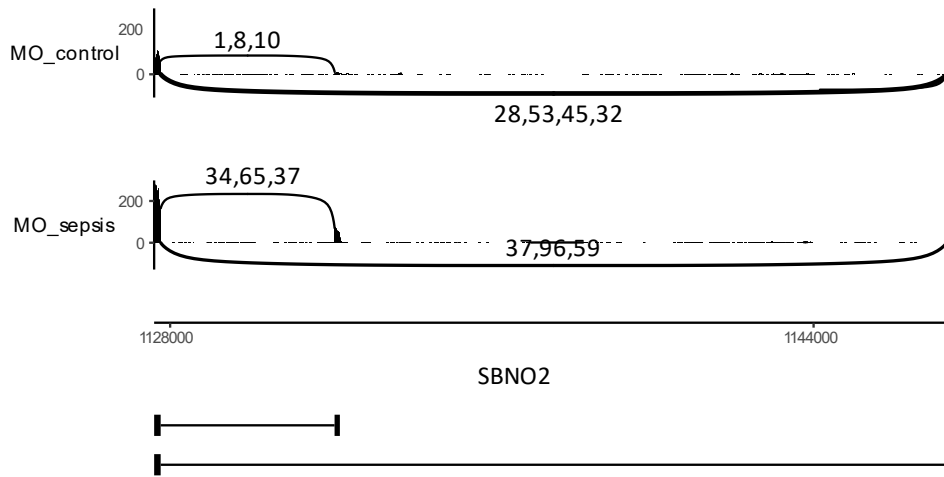

B

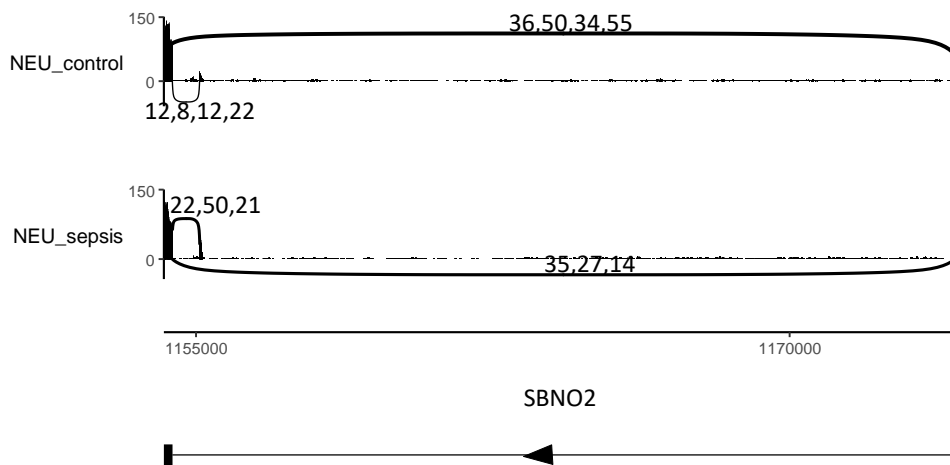

Figure S11

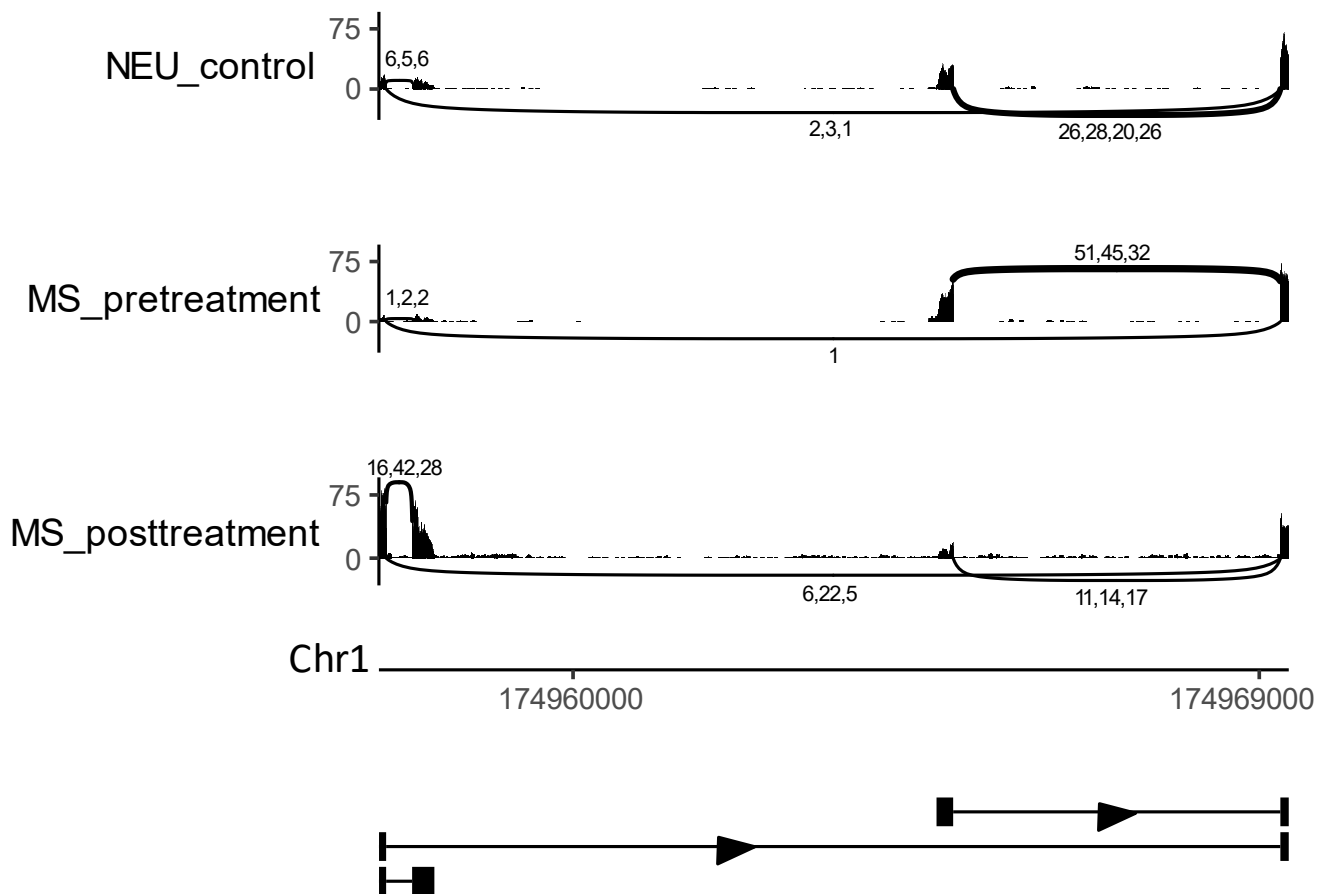

Figure S12
